# Supplementary material
Source: PubMed Central journal article supplement (PMC3259899)

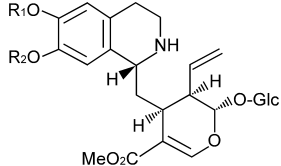

$R_1 = H, R_2 = H$  : *N*-Deacetylisoepicoside  
 $R_1 = Me, R_2 = H$  : 6-*O*-Methyl-*N*-deacetylisoepicoside  
 $R_1 = H, R_2 = Me$  : 7-*O*-Methyl-*N*-deacetylisoepicoside  
 $R_1 = Me, R_2 = Me$  : 6,7-*O*,*O*-Dimethyl-*N*-deacetylisoepicoside

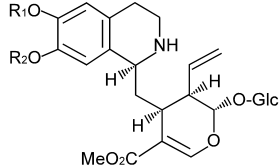

$R_1 = H, R_2 = H$  : *N*-Deacetylisoepicoside  
 $R_1 = Me, R_2 = H$  : 6-*O*-Methyl-*N*-deacetylisoepicoside  
 $R_1 = H, R_2 = Me$  : 7-*O*-Methyl-*N*-deacetylisoepicoside  
 $R_1 = Me, R_2 = Me$  : 6,7-*O*,*O*-Dimethyl-*N*-deacetylisoepicoside

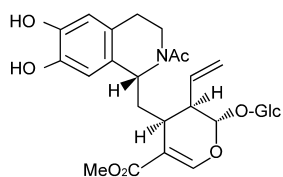

Ipecoside

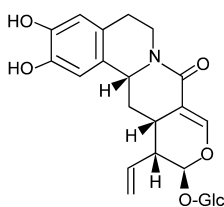

Demethylalangiside

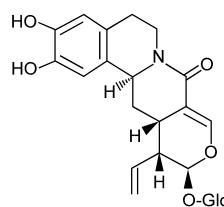

Demethylisoalangiside

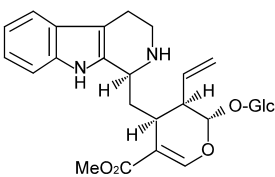

Strictosidine

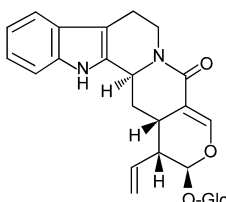

Strictosidine lactam

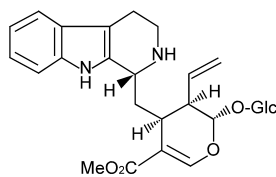

Vincoside

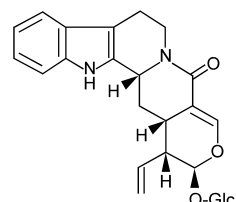

Vincoside lactam

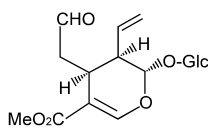

Secologanin

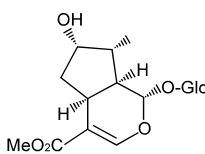

Loganin

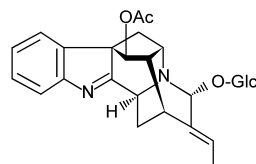

Raucaffricine

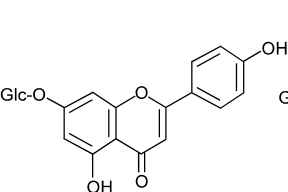

Apigenin-7-*O*-Glc

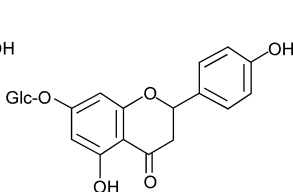

Naringenin-7-*O*-Glc

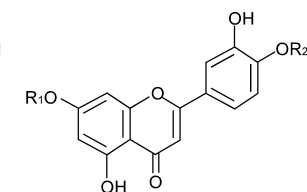

$R_1 = Glc, R_2 = H$  : Luteolin-7-*O*-Glc  
 $R_1 = H, R_2 = Glc$  : Luteolin-4'-*O*-Glc

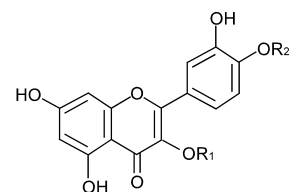

$R_1 = Glc, R_2 = H$  : Quercetin-3-*O*-Glc  
 $R_1 = H, R_2 = Glc$  : Quercetin-4'-*O*-Glc

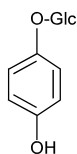

Arbutin

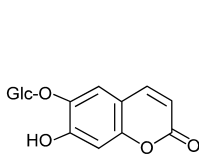

Esculin

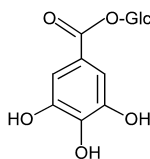

Galloyl-Glc

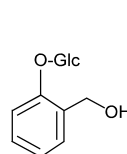

Salicin

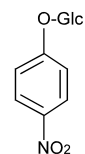

pNP-Glc

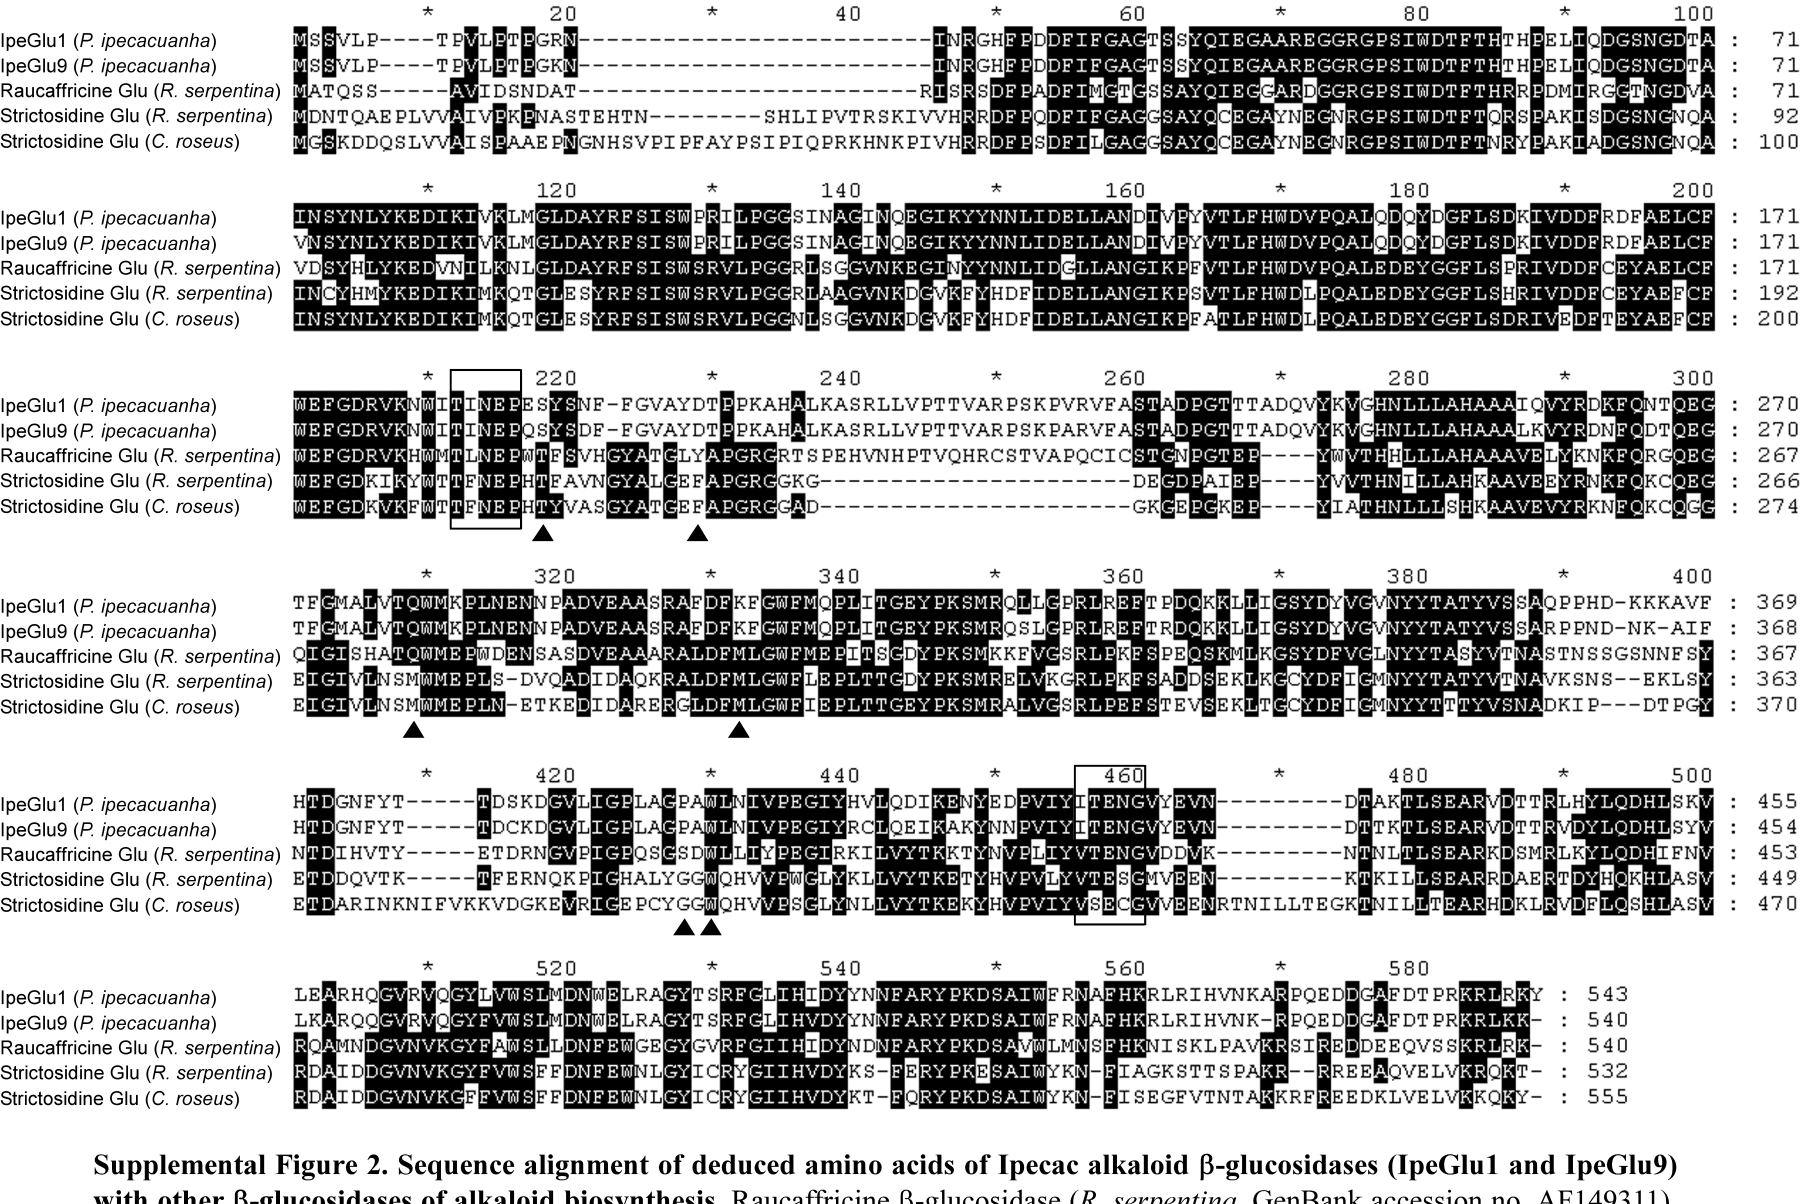

**Supplemental Figure 2. Sequence alignment of deduced amino acids of Ipecac alkaloid  $\beta$ -glucosidases (IpeGlu1 and IpeGlu9) with other  $\beta$ -glucosidases of alkaloid biosynthesis. Raucaffricine  $\beta$ -glucosidase (*R. serpentina*, GenBank accession no. AF149311), strictosidine  $\beta$ -glucosidase (*R. serpentina*, AJ302044) and strictosidine  $\beta$ -glucosidase (*C. roseus*, AF112888). Conserved sequence motifs among family 1 glycosyl hydrolases are boxed. Amino acid residues involved in the recognition of the aglycon moiety in strictosidine  $\beta$ -glucosidase of *R. serpentina* (32) are marked by black triangles.**

### Genomic clone-1

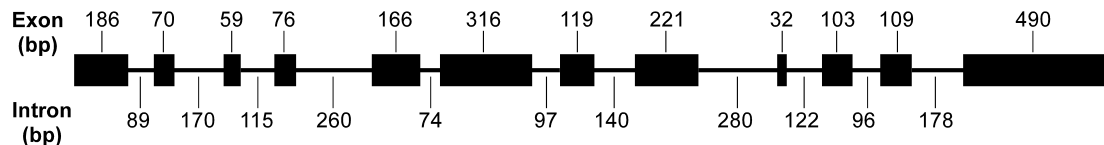

### Genomic clone-2

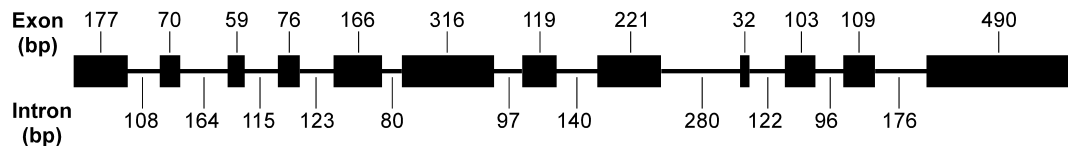

### Supplemental Figure 3. Exon-intron structure of the genomic clones of Ipecac alkaloid $\beta$ -glucosidase.

Exon and intron are shown by black box and line, respectively. The number shows the nucleotide length of each exon/intron. Genomic PCR products amplified using the same primers as used for the cloning of the *Ipeglu2-Ipeglu9* cDNAs were cloned into pCR-Blunt II-TOPO (Invitrogen) and sequenced. Genomic clone-1 (GenBank accession no. AB455585) is 3,568-bp long consisting of 1,947-bp exons and 1,621-bp introns. Genomic clone-2 (AB455586) is 3,439-bp long consisting of 1,938-bp exons and 1,501-bp introns. The exon sequences of the genomic clones-1 and -2 were identical to the *Ipeglu3* and *Ipeglu5* cDNA sequences, respectively. Both genomic clones comprised 12 exons and 11 introns.

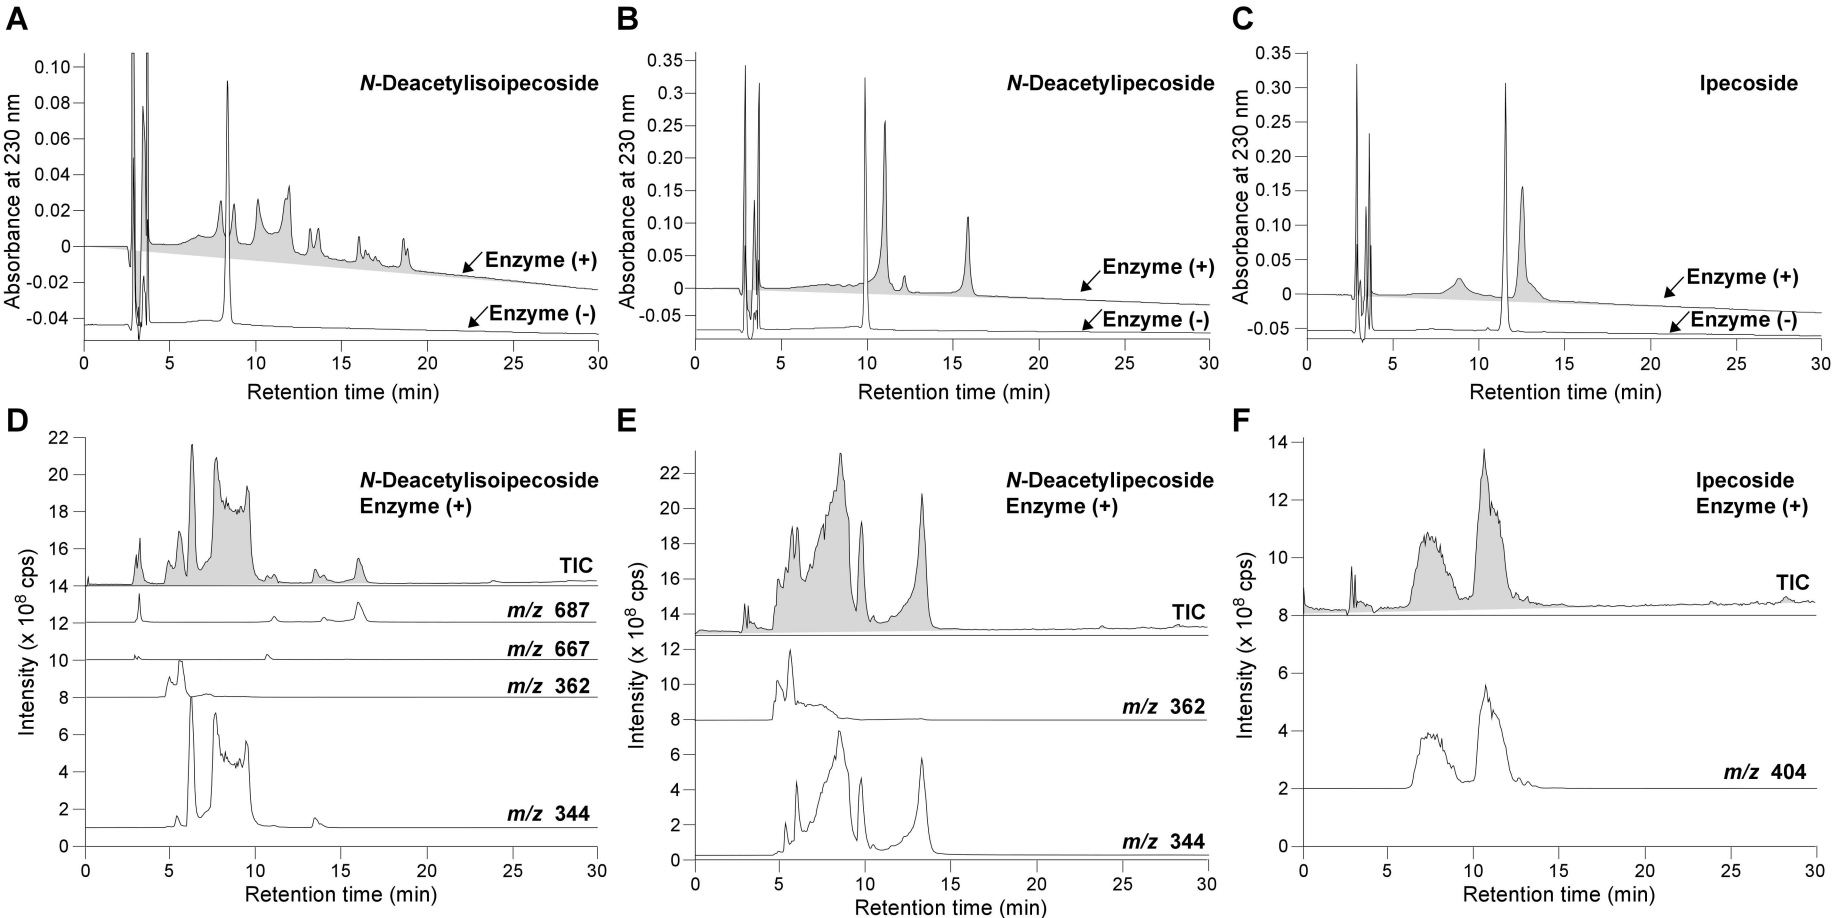

**Supplemental Figure 4. HPLC (A-C) and LC-MS/MS (D-F) analyses of the IpeGlu1 reaction mixture with *N*-deacetylisoipecoside (A and D), *N*-deacetylpeicoside (B and E), and ipecoside (C and F).** Chromatograms of the reaction mixture with (Enzyme +) or without (Enzyme -) enzyme are shown for HPLC analysis. The total ion chromatogram (TIC) and the chromatogram of individual molecular ions included in the reaction mixture are shown for LC-MS/MS analysis. Fragmentation of each molecular ion is not shown. Differences in the peak retention time between HPLC and LC-MS/MS analyses are due to the different HPLC systems.

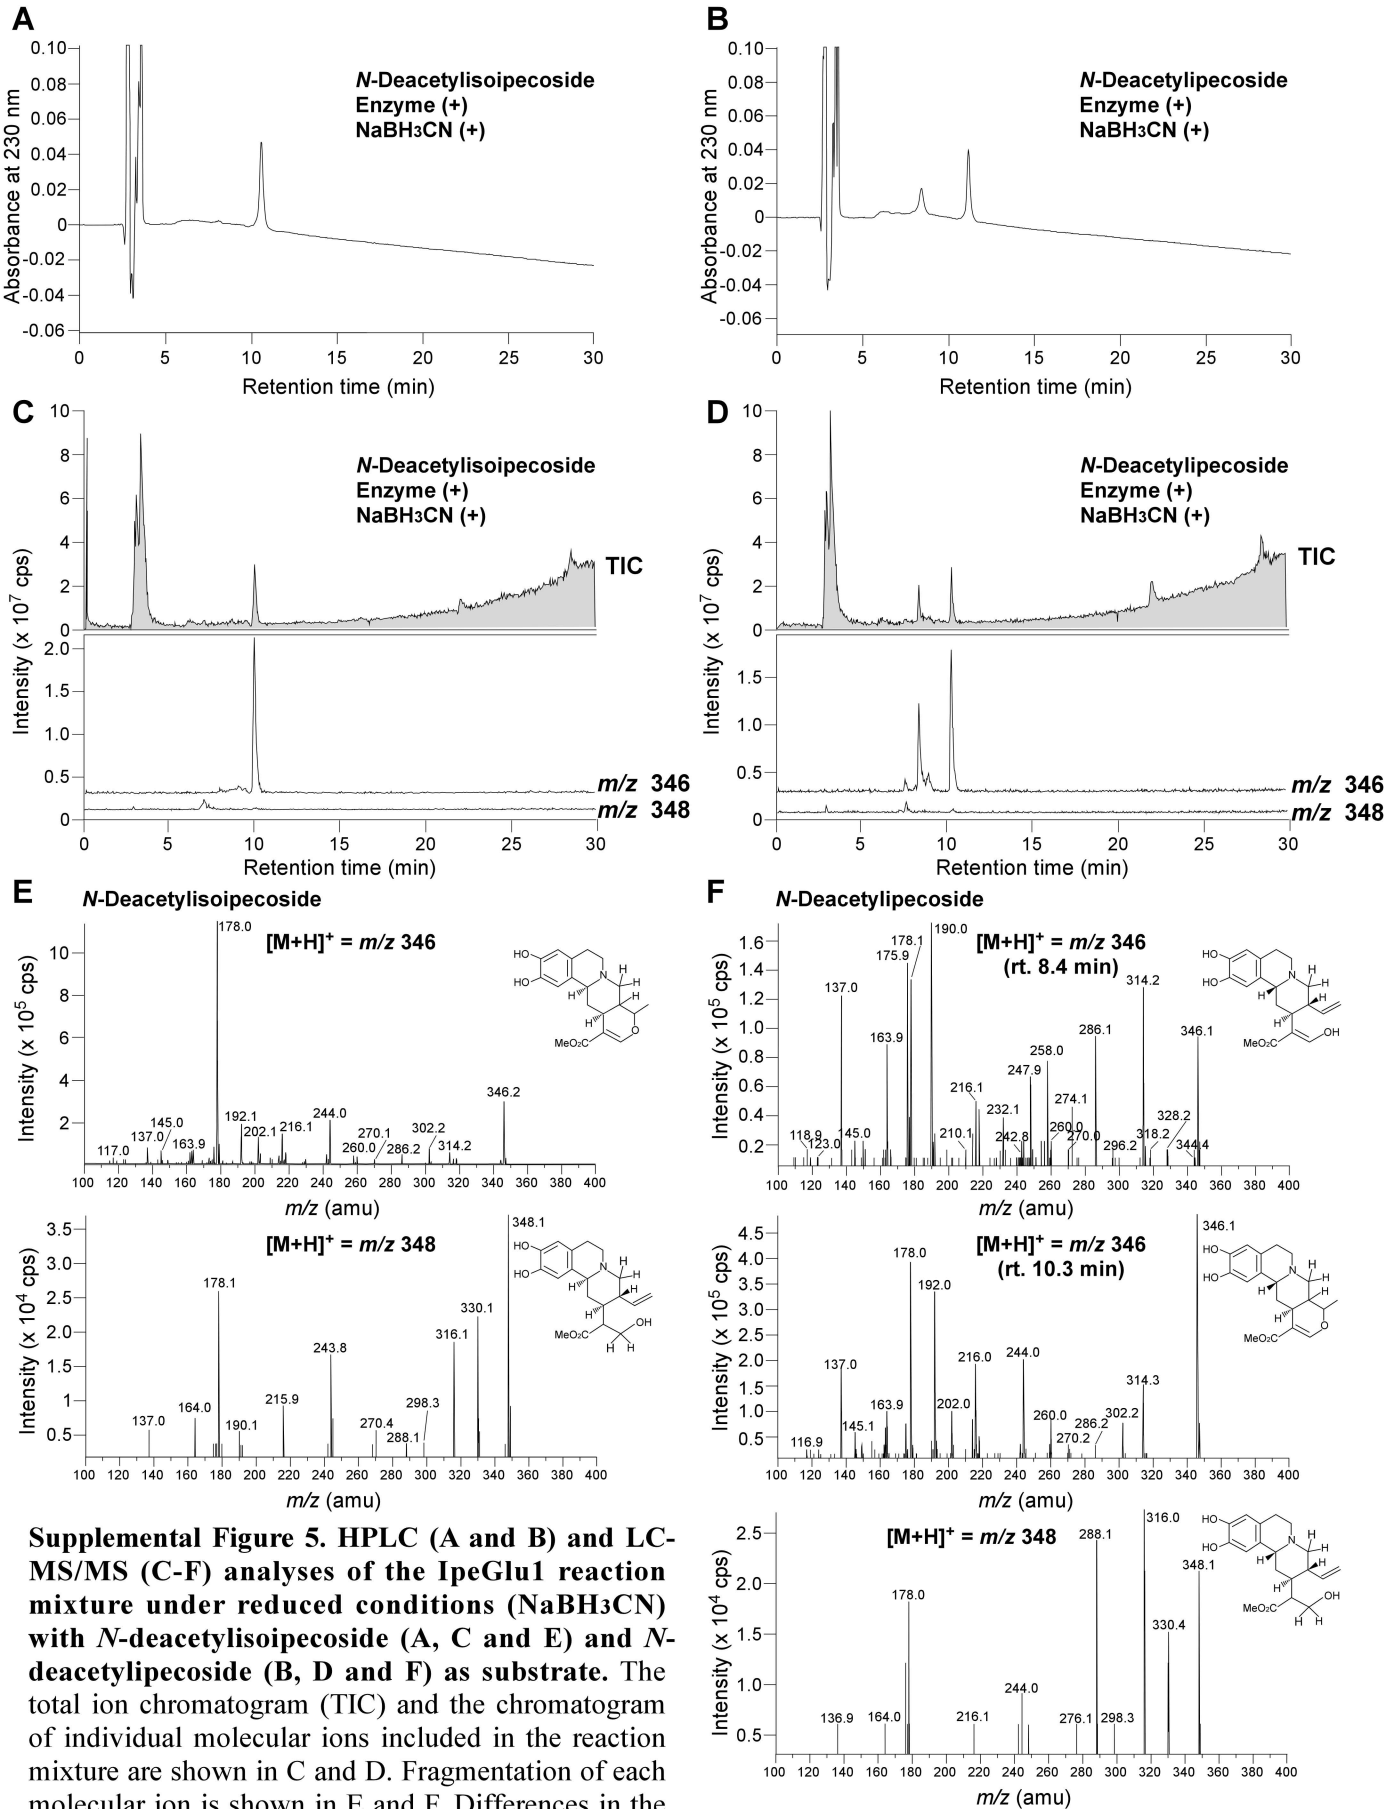

Supplement: M806953200_1.pdf [file M806953200_1.pdf]
